# Supplementary material for: Positive Impact of Pulsed Electric Field on Lactic Acid Removal, Demineralization and Membrane Scaling during Acid Whey Electrodialysis
Source: MDPI journal article supplement (doi:10.3390/ijms20040797), 2019-02-13
Supplement: s1 [file s1]

# Supplementary data

## Supplementary data A.

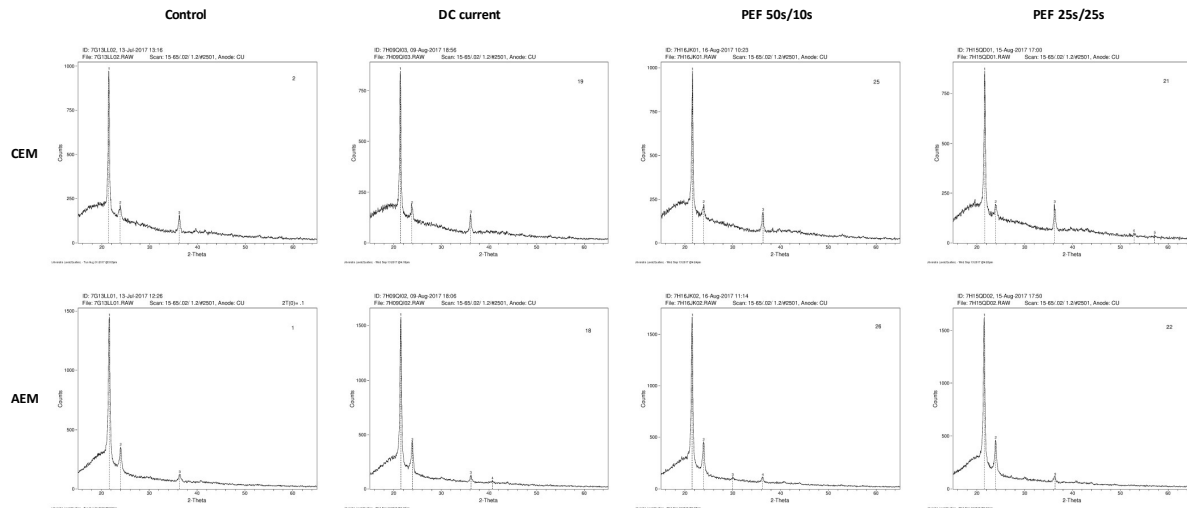

**Figure 1:** x-Ray diffraction of anion (AEM) and cation exchange membranes (CEM) for all current conditions. Both sides of each membrane were analyzed and gave similar results.

## Supplementary data B.

**Table 1:** Removal rates of calcium, potassium and magnesium in the whey after ED.

|                   | Ca             | K             | Mg             |
|-------------------|----------------|---------------|----------------|
|                   | Unit : %       |               |                |
| <b>DC current</b> | 45.00 ± 1.67a* | 81.27 ± 0.27a | 25.95 ± 2.80a  |
| <b>50s/10s</b>    | 45.67 ± 1.31a  | 80.90 ± 0.13a | 26.77 ± 1.62ab |
| <b>25s/25s</b>    | 52.84 ± 1.15b  | 85.14 ± 0.41b | 32.45 ± 1.84b  |

\* Using the same letter means that there is no significant difference between the values ( $P > 0.05$ ).
